1

2

3

4

Extreme ecological specialization in a rainforest mammal,

5

the Bornean tufted ground squirrel, *Rheithrosciurus macrotis*

6

7

8

Andrew J. Marshall<sup>1\*</sup>, Erik Meijaard<sup>2</sup>, and Mark Leighton<sup>3</sup>

9

10

<sup>1</sup>Department of Anthropology, Department of Ecology and Evolutionary Biology, Program in the

11

Environment, and School for Environment and Sustainability, 101 West Hall, 1085 S. University

12

Ave, Ann Arbor, Michigan, 48109 USA.

13

<sup>2</sup>Borneo Futures, Block C, Unit C8, Second Floor, Lot 51461, Kg Kota Batu, Mukim Kota Batu,

14

BA 2711, Brunei Darussalam.

15

<sup>3</sup>Harvard University, 11 Divinity Ave, Cambridge, MA, 02138, U.S.A.

16

17

\* Corresponding author

18

E-mail: [ajmarsha@umich.edu](mailto:ajmarsha@umich.edu) (AJM)

## 19 **Abstract**

20           The endemic Bornean tufted ground squirrel, *Rheithrosciurus macrotis*, has attracted great  
21 interest among biologists and the public recently. Nevertheless, we lack information on the most  
22 basic aspects of its biology. Here we present the first empirical data on the feeding ecology of  
23 tufted ground squirrels, and use data from 81 sympatric mammalian and avian vertebrates to place  
24 it within a broad comparative context. *R. macrotis* is a dedicated seed predator and shows much  
25 more extreme ecological specialization than any other vertebrate, feeding on a far smaller subset  
26 of available plant foods and demonstrating a greater reliance on a single plant species—*Canarium*  
27 *decumanum*—than any other vertebrate taxon. Our results suggest that *R. macrotis* plays an  
28 important, previously unknown role in the ecology of Bornean lowland forests, and highlight how  
29 much we have yet to learn about the fauna inhabiting some of the most diverse, and most severely  
30 threatened, ecosystems on the planet.

31

## 32 **Introduction**

33           The Bornean tufted ground squirrel, *Rheithrosciurus macrotis*, has been one of the most  
34 talked-about squirrels in recent years. This began with its characterization in the journal *Science*  
35 as the ‘vampire squirrel’ [1], which followed an account of local folklore that alleged these  
36 squirrels kill deer [2]. The moniker ‘vampire squirrel’ spread widely on social media across the  
37 globe. Interest in the squirrel spiked again in 2015 with the release of the first video recordings of  
38 these squirrels in the wild at Gunung Palung National Park in West Kalimantan [3]. Despite this  
39 global attention, *R. macrotis* remains a very poorly known and largely unstudied species. What we

40 do know is that the species is unusual in many respects. Firstly, phylogenetically it is the only  
41 species in SE Asia related to the Sciurini tribe, a large group of Holarctic and South American  
42 squirrel species. How *R. macrotis* colonized Borneo remains unclear because there are no known  
43 fossils that link it with the other Sciurini from which it separated some 8.6 million years ago [4-  
44 6]. *R. macrotis* also stands out because of its unusual incisors in both the upper and lower jaw,  
45 which bear a number of deeply carved ridges (~ 10) so that the incisors' cutting edge is saw-  
46 shaped, an arrangement apparently not recorded among other mammals [7]. Its species name likely  
47 links to this feature, with the Greek *ρείθρο* meaning gutter or groove. In addition, comparative  
48 morphometric analyses of squirrel mandibles show that *R. macrotis* is a dramatic outlier compared  
49 to other squirrels, particularly in its short, robust mandibles with short, wide articular processes  
50 [8]. Finally, *R. macrotis* appears to have the largest tail relative to body size of all mammal species,  
51 a possible anti-predator adaptation [2].

52         Although *R. macrotis* is a biogeographic enigma and morphologically unique, little of its  
53 basic ecology is known. To our knowledge there has not been any systematic field study of the  
54 species' ecology, although it has been recorded on camera traps at several sites in Borneo (e.g.,  
55 [9,10]). The large size and unusual shape of *R. macrotis* skulls [8, 11] coupled with their extremely  
56 stout incisors and powerful masseter muscles [12, 13] suggest the species is adapted to feeding on  
57 extremely hard seeds, but information on the species' feeding ecology is lacking. Here we present  
58 results of a long-term, comparative study of the feeding ecology of an intact community of Bornean  
59 rainforest vertebrates to describe the diet of *R. macrotis* and place the degree of its ecological  
60 specialization in comparative context. Based on anecdotal published characterizations [14, 15], we  
61 hypothesized that *R. macrotis* diets would be dominated by fruit of plants containing hard seeds.  
62 In addition, we hypothesized that the extreme morphological specialization of tufted ground

63 squirrels would be reflected in comparatively extreme ecological specialization on a limited subset  
64 of available plants. We found that *R. macrotis* is a dedicated seed predator and shows much more  
65 extreme ecological specialization than any other vertebrate taxon in our comparative sample.

66

## 67 **Materials and Methods**

68 We analyzed long-term feeding data gathered at the Cabang Panti Research Station (CPRS)  
69 in Gunung Palung National Park, West Kalimantan, Indonesia (1°13' S, 110°70' E, [16]). Gunung  
70 Palung National Park is a formally protected area and all required permits and approvals were  
71 secured for the duration of the study from the Indonesian Institute of Sciences (LIPI), the  
72 Directorate General for Nature Conservation (PHKA, now KSDAE), and the Gunung Palung  
73 National Park Unit (UTNGP, now BTNGP). The study site contains seven tropical forest types,  
74 classified based on soil type, drainage, altitude, and parent rock: peat swamp, freshwater swamp,  
75 alluvial bench, lowland sandstone, lowland granite, upland granite, and montane [17, 18]. Floristic  
76 composition, plant productivity, and mammal densities differ substantially across the habitat  
77 gradient [16, 19-21]. During the period of data collection, the site was largely unaffected by  
78 hunting or illegal logging, suggesting that the vertebrate and plant communities at the site are  
79 characteristic of Bornean lowland forests over recent ecological history.

80 The feeding data used to describe the diets of *R. macrotis* and compare them to other  
81 resident vertebrates were collected by ML and colleagues between March 1985 and March 1992.  
82 Trained observers recorded all instances of feeding by vertebrates along standardized census routes  
83 through the forest, and opportunistically during other fieldwork. Here we analyze only  
84 observations of feeding by vertebrates on fruit or fruit parts (e.g., pulp, seeds), and restrict analyses

85 to independent feeding observations to avoid pseudo-replication (n= 4247, see [18] for a full  
86 description of methods). The data set comprises feeding observations for 82 mammalian and avian  
87 taxa. Primates (42% of observations) and Rodentia (19%) were the most well-sampled mammalian  
88 orders, with additional observations of Artiodactyla (5%), Carnivora (1,6%), and Chiroptera  
89 (1.5%). Bucerotiformes (14%), Passeriformes (7 %), and Piciformes (6%) were the best-sampled  
90 avian taxa; with additional observations of Columbiformes (1.9%), Galliformes (1.4%),  
91 Psittaciformes (0.6%), and Trogoniformes (0.2%).

92 We compared the dietary diversity of *R. macrotis* with sympatric vertebrates by fitting  
93 quadratic plant genus accumulation curves for all vertebrate taxa in our dataset and comparing the  
94 species-specific residuals. Vertebrates with large negative residual values were those that fed on a  
95 smaller number of plant genera than expected based on the number of feeding observations made  
96 (i.e., they specialized on a limited set of plant foods). We used plant genera as the unit for our  
97 comparative analyses to account for different levels of taxonomic certainty among plant groups at  
98 CPRS [22-24]. To compare the extent of specialization on specific plant genera, we analyzed the  
99 dietary composition of all vertebrates for which at least 70 independent feeding observations were  
100 available (mean = 274 obs, range 72–549). This resulted in a sample of 12 well-sampled species  
101 for comparative analysis. We used the program R 3.3.1 for all analyses and to produce the figures  
102 [25]. All code (S1 Code) and data (S2-S6 Data) necessary to replicate our analyses are included as  
103 supporting information.

104

## 105 **Results**

106           The field team recorded a total of 79 independent feeding observations for *R. macrotis*,  
107 somewhat more observations than for the typical taxon in our dataset (mean= 52, SD = 112, range  
108 1–549 observations/species). These 79 records included feeding on 5 plant taxa; the average  
109 number of genera recorded for each vertebrate taxon was 10 (SD = 19, range = 1–88, S2 Data).  
110 The most commonly observed taxon in the *R. macrotis* diet was *Canarium decumanum* (n=61  
111 observations), followed by *Mezzetia leptopoda* (n=10), *Elaeocarpus* spp. (n=4), *Dracontomelon*  
112 sp. (n= 3), and *Irvingia malayana* (n=1). All *R. macrotis* feeding observations entailed feeding on  
113 seeds. Although comparative empirical data on seed hardness are not available, *C. decumanum*  
114 and *M. leptopoda* are widely known to be among the hardest seeds found in the Bornean rainforest  
115 (AJM, ML personal observations, [26, 27]). Thus, as we hypothesized, the diet of *R. macrotis* is  
116 dominated by a small number of plant taxa with extremely hard seeds. Indeed, the plant taxa fed  
117 upon by tufted ground squirrels are rarely consumed by any other vertebrates, presumably because  
118 their hard seeds are inaccessible to most other taxa [28, S3 Data]. For example, of the 67  
119 independent feeding observations of *C. decumanum* seeds, 59 (88%) were by *Rheithrosciurus*. The  
120 only other taxa we observed eating *C. decumanum* seeds were bearded pigs (*Sus barbatus*) and  
121 giant squirrels (*Ratufa affinis*), each of which were observed to feed on them 4 times (6%). Both  
122 are taxa with powerful jaws known to prey on hard seeds [8, 15, 29]. Of the 15 observations of  
123 vertebrate feeding on *M. leptopoda* seeds, 10 (67%) were by *R. macrotis* and the remaining 5 were  
124 by bearded pigs (*Sus barbatus*, n=3, 20%) and giant squirrels (*Ratufa affinis*, n=2, 13%, S4 Data).

125           We also found support for our second hypothesis. *R. macrotis* was extremely ecologically  
126 specialized, restricting its feeding to a smaller subset of plant genera than any other vertebrate  
127 taxon in our dataset (S2 Data). We observed vertebrate feeding on 159 plant genera. As expected,  
128 the number of plant genera recorded in a vertebrate species' diet increased in a curvilinear fashion

129 with the number of feeding observations recorded (Fig 1,  $R^2= 0.97$ ,  $n= 82$  vertebrates,  $p < 2.2 \times$   
130  $10^{-16}$ ). *R. macrotis* exhibited a residual value of  $-18.2$ , indicating that it has been recorded feeding  
131 on 18 fewer genera than predicted based on the number of feeding observations we recorded. No  
132 other taxon exhibits such specialization, with the range of residuals for other species ranging from  
133  $-8.1$  to  $11.3$ . The closest species to *R. macrotis* is the long-tailed parakeet (*Psittacula longicauda*,  
134 residual =  $-8.1$ ), which is also a highly specialized seed predator [29].

135 **Fig 1. Taxonomic richness of vertebrate frugivore diets.** Plot shows the number of plant genera  
136 consumed by each vertebrate species plotted against sample size. The plot excludes observations  
137 of feeding on the common genus *Ficus*. The curve shows predicted dietary richness (solid line)  
138 and the upper and lower 95% confidence intervals (dashed lines). The tufted ground squirrel (TGS,  
139 indicated in orange) consumes a much more restricted number of plant genera than expected, and  
140 exhibits a much more negative residual than any other taxon.

141

142 To further examine the extent of dietary specialization of tufted ground squirrels relative  
143 to sympatric vertebrate frugivores, we calculated the importance of each plant taxon in the diets of  
144 the twelve most well-sampled vertebrates at CPRS (S5 Data). *C. decumanum* comprised 77% of  
145 all *R. macrotis* feeding observations (*C. decumanum* was the only species in the *Canarium* genus  
146 consumed by tufted ground squirrels). Only the diverse, keystone plant genus *Ficus* was  
147 comparable in its importance in vertebrate diets, comprising more than 80% of the diets of  
148 rhinoceros hornbills (*Buceros vigil*) and gold-whiskered barbets (*Megalaima chrysopogon*) and  
149 more than 20% of the diets of four other frugivores (Fig 2). No other plant genus comprised more  
150 than 22% of the feeding observations of our twelve most well-sampled vertebrate taxa.

151 Interestingly, after *R. macrotis*, the two vertebrates with the largest reliance on a non-fig plant  
152 genus were the seed predators bearded pigs (for which *Shorea* seeds comprised 21.9% of feeding  
153 observations) and giant squirrels (for which *Lithocarpus* nuts comprised 21.3% of feeding  
154 observations). Excluding the extremely specialized tufted ground squirrel, the degree of  
155 specialization on non-fig items was not well predicted by overall sample size ( $\beta = -0.0001$ ,  $R^2 =$   
156  $0.11$ ,  $n = 11$  vertebrates,  $p = 0.32$ ) nor the number of items recorded in the diet ( $\beta = -0.0003$ ,  $R^2 =$   
157  $0.02$ ,  $n = 11$  vertebrates,  $p = 0.68$ , S6 Data).

158

159 **Fig 2: Ecological specialization among well-sampled vertebrates.** Histograms of the dietary  
160 importance (proportion of total feeding observations) of all plant taxa fed upon by twelve focal  
161 vertebrate taxa. Histogram bins are 0.02 in width; y-axis scale depicts the maximum and 1/2 the  
162 maximum number of plant items in the tallest bin for each vertebrate. Orange and blue dots indicate  
163 the importance of *Canarium* and *Ficus*, respectively. Vertebrate species are listed in decreasing  
164 order based on the importance of the most important non-fig plant genus in the diet (indicated by  
165 the gray rug line below the x-axis in each panel): *R. macrotis*, *S. barbatus*, *R. affinis*, *Calyptomena*  
166 *viridis*, *Anorrhinus galeritus*, *Macaca fascicularis*, *Pongo pygmaeus*, *Buceros vigil*, *Presbytis*  
167 *rubicunda*, *Hylobates albibarbis*, *Megalaima chrysopogon*, and *Callosciurus prevostii*.

168

## 169 Discussion

170 Our systematic study of the feeding ecology of Bornean tufted ground squirrels confirms  
171 previous anecdotal descriptions of the species [14, 15]. We provide clear evidence that the species



172 is a seed predator and focuses its feeding on plants bearing extremely hard seeds, especially *C.*  
173 *decumanum* and *M. leptopoda*. Two measures indicate that *R. macrotis* is the most specialized  
174 vertebrate taxon in this forest. First, when we controlled for sampling effort, the taxonomic  
175 richness of *R. macrotis* diets is far less than that of any other vertebrate frugivore at Cabang Panti.  
176 Second, tufted ground squirrels focus on a single plant genus, *Canarium*, far more than any other  
177 vertebrate focuses on a single plant genus, with the exception of feeding on the diverse genus *Ficus*  
178 (see below). In this context, it is interesting that one of the first descriptions of *R. macrotis* explains  
179 that an individual was “[s]hot in the deep jungle during the morning after heavy rainfall, when the  
180 animal was looking for fruit under a *Canarium* tree...” ([15]: 125, translated from German). This  
181 intense specialization of tufted ground squirrels suggests that they play a crucial role in the ecology  
182 of *Canarium* trees— primarily as a seed predator, although likely as an occasional disperser as well  
183 in instances where the squirrel buries a seed and fails to return to feed on it (ML personal  
184 observation, [15]). In turn, this strong effect on *Canarium* ecology likely has cascading effects on  
185 other large canopy tree species that compete with *Canarium*. Specialized seed predators play  
186 crucial functions in the ecology of Southeast Asian rainforests [28-30]. Of particular importance  
187 are *Psittacula*, *Sus*, and *Ratufa*, which are the taxa in our analysis most similar to *Rheithrosciurus*  
188 in their specialization (*Psittacula*) and diet composition (*Sus* and *Ratufa*). This suggests that *R.*  
189 *macrotis* may also play a crucial, heretofore unidentified, role in the ecology of Southeast Asian  
190 forests.

191 *Ficus* is the one plant taxon that exceeds *Canarium* in its importance in the diets of  
192 frugivores at the Cabang Panti Research Station (Figure 2). This is not unexpected, both because  
193 *Ficus* is a highly diverse plant taxon at this site (56 species in Gunung Palung National Park, [31])  
194 and because it exhibits phenological patterns that make it a keystone species that provides

195 sustenance to a wide range of animals during periods of resource scarcity [32-34]. *Ficus* is widely  
196 recognized as a uniquely important plant taxon for tropical frugivores, and it is therefore notable  
197 that *Canarium* seeds are of comparable importance to *R. macrotis* in our sample. Unlike *Ficus*,  
198 however, *Canarium* is not of major importance to any other vertebrates— suggesting the intensive  
199 use of its seeds solely by tufted ground squirrels is a uniquely tightly integrated ecological  
200 relationship that deserves further investigation.

201         While our data present an intriguing story of intense ecological specialization in a rainforest  
202 mammal, it is notable that 79 feeding observations constitutes the most complete account of *R.*  
203 *macrotis* ecology ever published. The tufted ground squirrel has attracted an astonishing amount  
204 of interest in the scientific and popular press. Erik Stokstad’s news piece in the ‘vampire squirrel’  
205 was the second most read and commented upon article on the website of the journal *Science* during  
206 the first week of September 2015— sharing the stage with weighty scientific discussions of “why  
207 big societies need big gods” and “how big is the average penis”. *R. macrotis* also possesses several  
208 highly unusual features that make it a legitimate subject of serious research attention. In this  
209 context, it is truly remarkable how little we know about the species— although our evidence  
210 suggests that “assassin squirrel” would be a better moniker than “vampire squirrel”. This highlights  
211 our more general ignorance of the biodiversity of Borneo and other parts of the tropics. The vast  
212 majority of published research concerns a very limited subset of taxa (e.g., [35, 36]) and with  
213 forests in Indonesia and across the tropics being lost at alarming rates [37, 38] we run the risk of  
214 losing species before we can collect even the most basic information about their ecology. This is  
215 of particular concern for species, such as *R. macrotis*, that are restricted to undisturbed lowland  
216 forests and predicted to be highly intolerant of logging and other forms of disturbance [39].

217

## 218 **Acknowledgments**

219           Permission to conduct research at Gunung Palung National Park was kindly granted by the  
220 Indonesian Institute of Sciences (LIPI), the Directorate General for Nature Conservation (PHKA,  
221 now KSDAE), and the Gunung Palung National Park Office (UTNGP, now BTNGP). We are  
222 grateful to Universitas Tanjungpura for counterpart support. We appreciate the assistance and  
223 support of the many students, researchers, and field assistants who worked at Cabang Panti  
224 Research Station over the past three decades. Special thanks to Emilio Bruna for suggesting the  
225 name “assassin squirrel”.

226

## 227 **References**

- 228 1. Stokstad E. 'Vampire' squirrel has world's fluffiest tail. *Science*. 2014 Jun 30. Available from:  
229 [http://news.sciencemag.org/plants-animals/2014/06/vampire-squirrel-has-worlds-fluffiest-](http://news.sciencemag.org/plants-animals/2014/06/vampire-squirrel-has-worlds-fluffiest-tail)  
230 [tail](http://news.sciencemag.org/plants-animals/2014/06/vampire-squirrel-has-worlds-fluffiest-tail)
- 231 2. Meijaard EM, Dennis RA, Meijaard E. Tall tales of a tropical squirrel. *Taprobanica* 2014; 6: 27-  
232 31.
- 233 3. Stokstad, E. 'Vampire' squirrel caught on film. *Science*. 2015 Sep 2. Available from:  
234 <http://news.sciencemag.org/plants-animals/2015/09/vampire-squirrel-caught-film>
- 235 4. Mercer JM, Roth VL. The effects of Cenozoic global change on squirrel phylogeny. *Science*  
236 2003; 299: 1568-1572.

- 237 5. Pečnerová P, Martínková N. Evolutionary history of tree squirrels (Rodentia, Sciurini) based on  
238 multilocus phylogeny reconstruction. *Zoologica Scripta* 2012; 4: 211-219.
- 239 6. Pečnerová P, Moravec JC, Martínková N. A skull might lie: modeling ancestral ranges and diet  
240 from genes and shape of tree squirrels. *Syst. Biol.* 2015; 64: 1074-1088.
- 241 7. Jentink FA. Note II. Zoological results of the Dutch scientific expedition to Central Borneo. The  
242 mammals. *Notes from the Leyden Museum* 1897: 19.
- 243 8. Casanovas-Vilar I, van Dam J. Conservatism and adaptability during squirrel radiation: what is  
244 mandible shape telling us?. *PLoS ONE* 2013; 8: e61298.
- 245 9. Bernard H, Ahmad AH, Brodie J, Giordano AJ, Lakim M, Amat R, et al. Camera-Trapping  
246 survey of mammals in and around Imbak Canyon Conservation Area in Sabah Malaysian  
247 Borneo. *Raffles Bull. Zool.* 2013; 61: 861-870.
- 248 10. Mohamed AJ, Lading E. Camera trapping and conservation in Lambir Hills National Park,  
249 Sarawak. *Raffles Bull. Zool.* 2006; 54: 469-475.
- 250 11. Zahn W. Die Riesen-, Streifen- und Spitznasenhörnchen der orientalischen Region. *Mamm.*  
251 *Biol.* 1941; 16:1-182.
- 252 12. Gyldenstolpe N. On a collection of mammals made in eastern and central Borneo by Mr. Carl  
253 Lumholtz. *K. Svenska Vetens-Akad. Handl.* 1920; 60: 1-62.
- 254 13. Thorington JRW, Darrow DK. Jaw Muscles of Old World Squirrels. *Journal of Morphology*  
255 1996; 230: 145-165.

- 256 14. Jentink DFA. Note XX. Zoological results of the Dutch scientific expedition to Central Borneo.  
257 The Mammals. Notes Leyden Museum 1898; 20: 113-125.
- 258 15. Phillipps Q, Phillipps K. Phillipps' Field Guide to the Mammals of Borneo and Their Ecology.  
259 Princeton, N. J.: Princeton University Press; 2016.
- 260 16. Marshall AJ, Beaudrot L, Wittmer HUW. Responses of primates and other frugivorous  
261 vertebrates to plant resource variability over space and time at Gunung Palung National Park.  
262 Int. J. Primatol. 2014; 35, 1178-1201.
- 263 17. Marshall, A. J. Effects of habitat quality on primate populations in Kalimantan: gibbons and  
264 leaf monkeys as case studies. In Supriatna J, Gursky SL, editors. Indonesian Primates. New  
265 York: Springer; 2010. Pp. 157-177.
- 266 18. Marshall AJ, Cannon CH, Leighton M. Competition and niche overlap between gibbons  
267 (*Hylobates albibarbis*) and other frugivorous vertebrates in Gunung Palung National Park,  
268 West Kalimantan, Indonesia. In Lappan S, Whittaker DJ, editors. The gibbons: New  
269 perspectives on small ape socioecology and population biology. New York: Springer; 2009.  
270 pp. 161-188.
- 271 19. Cannon CH, Curran LM, Marshall AJ Leighton M. Beyond mast-fruiting events: Community  
272 asynchrony and individual dormancy dominate woody plant reproductive behavior across  
273 seven Bornean forest types. Current Science. 2007; 93:1558-1566.
- 274 20. Cannon CH, Curran LM, Marshall AJ Leighton M. Long-term reproductive behavior of woody  
275 plants across seven Bornean forest types in the Gunung Palung National Park, Indonesia:

- 276           suprannual synchrony, temporal productivity, and fruiting diversity. *Ecol. Lett.* 2007; 93:  
277           956-969.
- 278 21. Marshall AJ. Are montane forests demographic sinks for Bornean white-bearded gibbons?  
279           *Biotropica* 2009; 41: 257-267.
- 280 22. Bacci T, Trabucco B, Marzialetti S, Marusso V, Lomiri S, Vani D et al. Taxonomic sufficiency  
281           in two case studies: where does it work better? *Marine Ecol.* 2009; 30: 13- 19.
- 282 23. Marshall AJ, Leighton, M. How does food availability limit the population density of white-  
283           bearded gibbons? In *Feeding Ecology of the Apes and other Primates*, Hohmann G, Robbins  
284           MM, Boesch C, editors. Cambridge: Cambridge University Press; 2006. pp. 311–333.
- 285 24. Timms LL, Bowden JJ, Summerville KS, Buddle CM Does species-level resolution matter?  
286           Taxonomic sufficiency in terrestrial arthropod biodiversity studies. *Insect Conserv. Divers.*  
287           2013; 6: 453-462.
- 288 25. R Core Team R: A language and environment for statistical computing. R Foundation for  
289           Statistical Computing, Vienna, Austria. 2015. Available from: <https://www.R-project.org/>.
- 290 26. Lucas PW, Gaskins JT, Lowrey TK, Harrison ME, Morrogh-Bernard H, Cheyne SM, et al.  
291           Evolutionary optimization of material properties of a tropical seed. *J. R. Soc. Interface* 2012;  
292           9: 34e42.
- 293 27. Vogel ER, van Woerden JT, Lucas PW, Utami Atmoko SS, van Schaik CP, Dominy NJ.  
294           Functional ecology and evolution of hominoid molar enamel thickness: *Pan troglodytes*  
295           *schweinfurthii* and *Pongo pygmaeus wurmbii*. *J. Hum. Evol.* 2008; 55 :60-74.

- 296 28. Blate GM, Peart DR, Leighton M. Post-Dispersal Predation on Isolated Seeds: A Comparative  
297 Study of 40 Tree Species in a Southeast Asian Rainforest. *Oikos* 1998; 82: 522-538.
- 298 29. Curran LM, Leighton M. Vertebrate responses to spatiotemporal variation in seed production  
299 of mast- fruiting Dipterocarpaceae. *Ecol. Monogr.* 2000; 70: 101-128.
- 300 30. Janzen DH. Tropical blackwater rivers, animals and mast fruiting by the Dipterocarpaceae.  
301 *Biotropica* 1974; 4: 69–103.
- 302 31. Laman TG, Weiblen GD. Figs of Gunung Palung National Park (West Kalimantan, Indonesia).  
303 *Tropical Biodiversity* 1998; 5: 245-297.
- 304 32. Dillis C, Beaudrot L, Clink DJ, Feilen KL, Wittmer HU, Marshall AJ. Modeling the ecological  
305 and phenological predictors of fruit consumption by gibbons (*Hylobates albibarbis*).  
306 *Biotropica*. 2015; 47: 85-93.
- 307 33. Marshall AJ, Boyko CM, Feilen KL, Boyko RH, Leighton M. Defining fallback foods and  
308 assessing their importance in primate ecology and evolution. *Am J Phys Anthropol.* 2009;  
309 140: 603-614.
- 310 34. Shanahan M, So S, Compton SG, Corlett R. Fig-eating by vertebrate frugivores: a global  
311 review. *Biological Reviews* 2001; 76: 529-572.
- 312 35. Brodie JF. Is research effort allocated efficiently for conservation? Felidae as a global case  
313 study. *Biodivers Conserv* 2009; 18, 2927-2939.

- 314 36. Marshall AJ, Meijaard E, Van Cleave E, Sheil D. Charisma counts: the presence of great apes  
315 affects the allocation of research effort in the paleotropics. *Front Ecol Environ*. 2016; 14: 13-  
316 19.
- 317 37. FAO. Global Forest Land-use Change 1990–2005. Food and Agriculture Organization of the  
318 United Nations. 2012.
- 319 38. Gaveau DLA, Sloan S, Molidena E, Yaen H, Sheil D, Abram NK, et al. Four decades of forest  
320 persistence, clearance and logging on Borneo. *PLoS ONE* 2014; 9: 11.
- 321 39. Meijaard E, Sheil S. The persistence and conservation of Borneo’s mammals in lowland rain  
322 forests managed for timber: observations, overviews and opportunities. *Ecol. Res.* 2008; 23:  
323 21-34.

324

## 325 **Supporting information**

326 **S1 Code. All code necessary to replicate the analyses presented in this paper.** All required data  
327 are included as supporting information; descriptions of the contents of each data file are provided  
328 in this RMarkdown code file.

329 (Rmd)

330 **S2 Data. Vertebrate feeding data.** File includes summary feeding information for *R. macrotis*  
331 and 81 comparison vertebrate taxa (e.g., taxon, number of independent feeding observations,  
332 number of unique plant genera eaten).

333 (csv)



334 **S3 Data. Observations of feeding by *R. macrotis*.** File lists all 79 independent feeding  
335 observations made by the tufted ground squirrel, classified to plant genus.

336 (csv)

337 **S4 Data. Observations of feeding on *Canarium decumanum* and *Mezzetia leptopoda*.** File lists  
338 all observations of feeding on two extremely hard-seeded plant species.

339 (csv)

340 **S5 Data. Dietary importance of all plant genera consumed by the twelve most well-sampled**  
341 **vertebrate taxa.**

342 (csv)

343 **S6 Data. Summary characterization of the diets of the twelve most well-sampled vertebrate**  
344 **taxa.**

345 (csv)

346

bioRxiv preprint doi: <https://doi.org/10.1101/2020.08.03.233999>; this version posted August 3, 2020. The copyright holder for this preprint (which was not certified by peer review) is the author/funder, who has granted bioRxiv a license to display the preprint in perpetuity. It is made available under aCC-BY 4.0 International license.

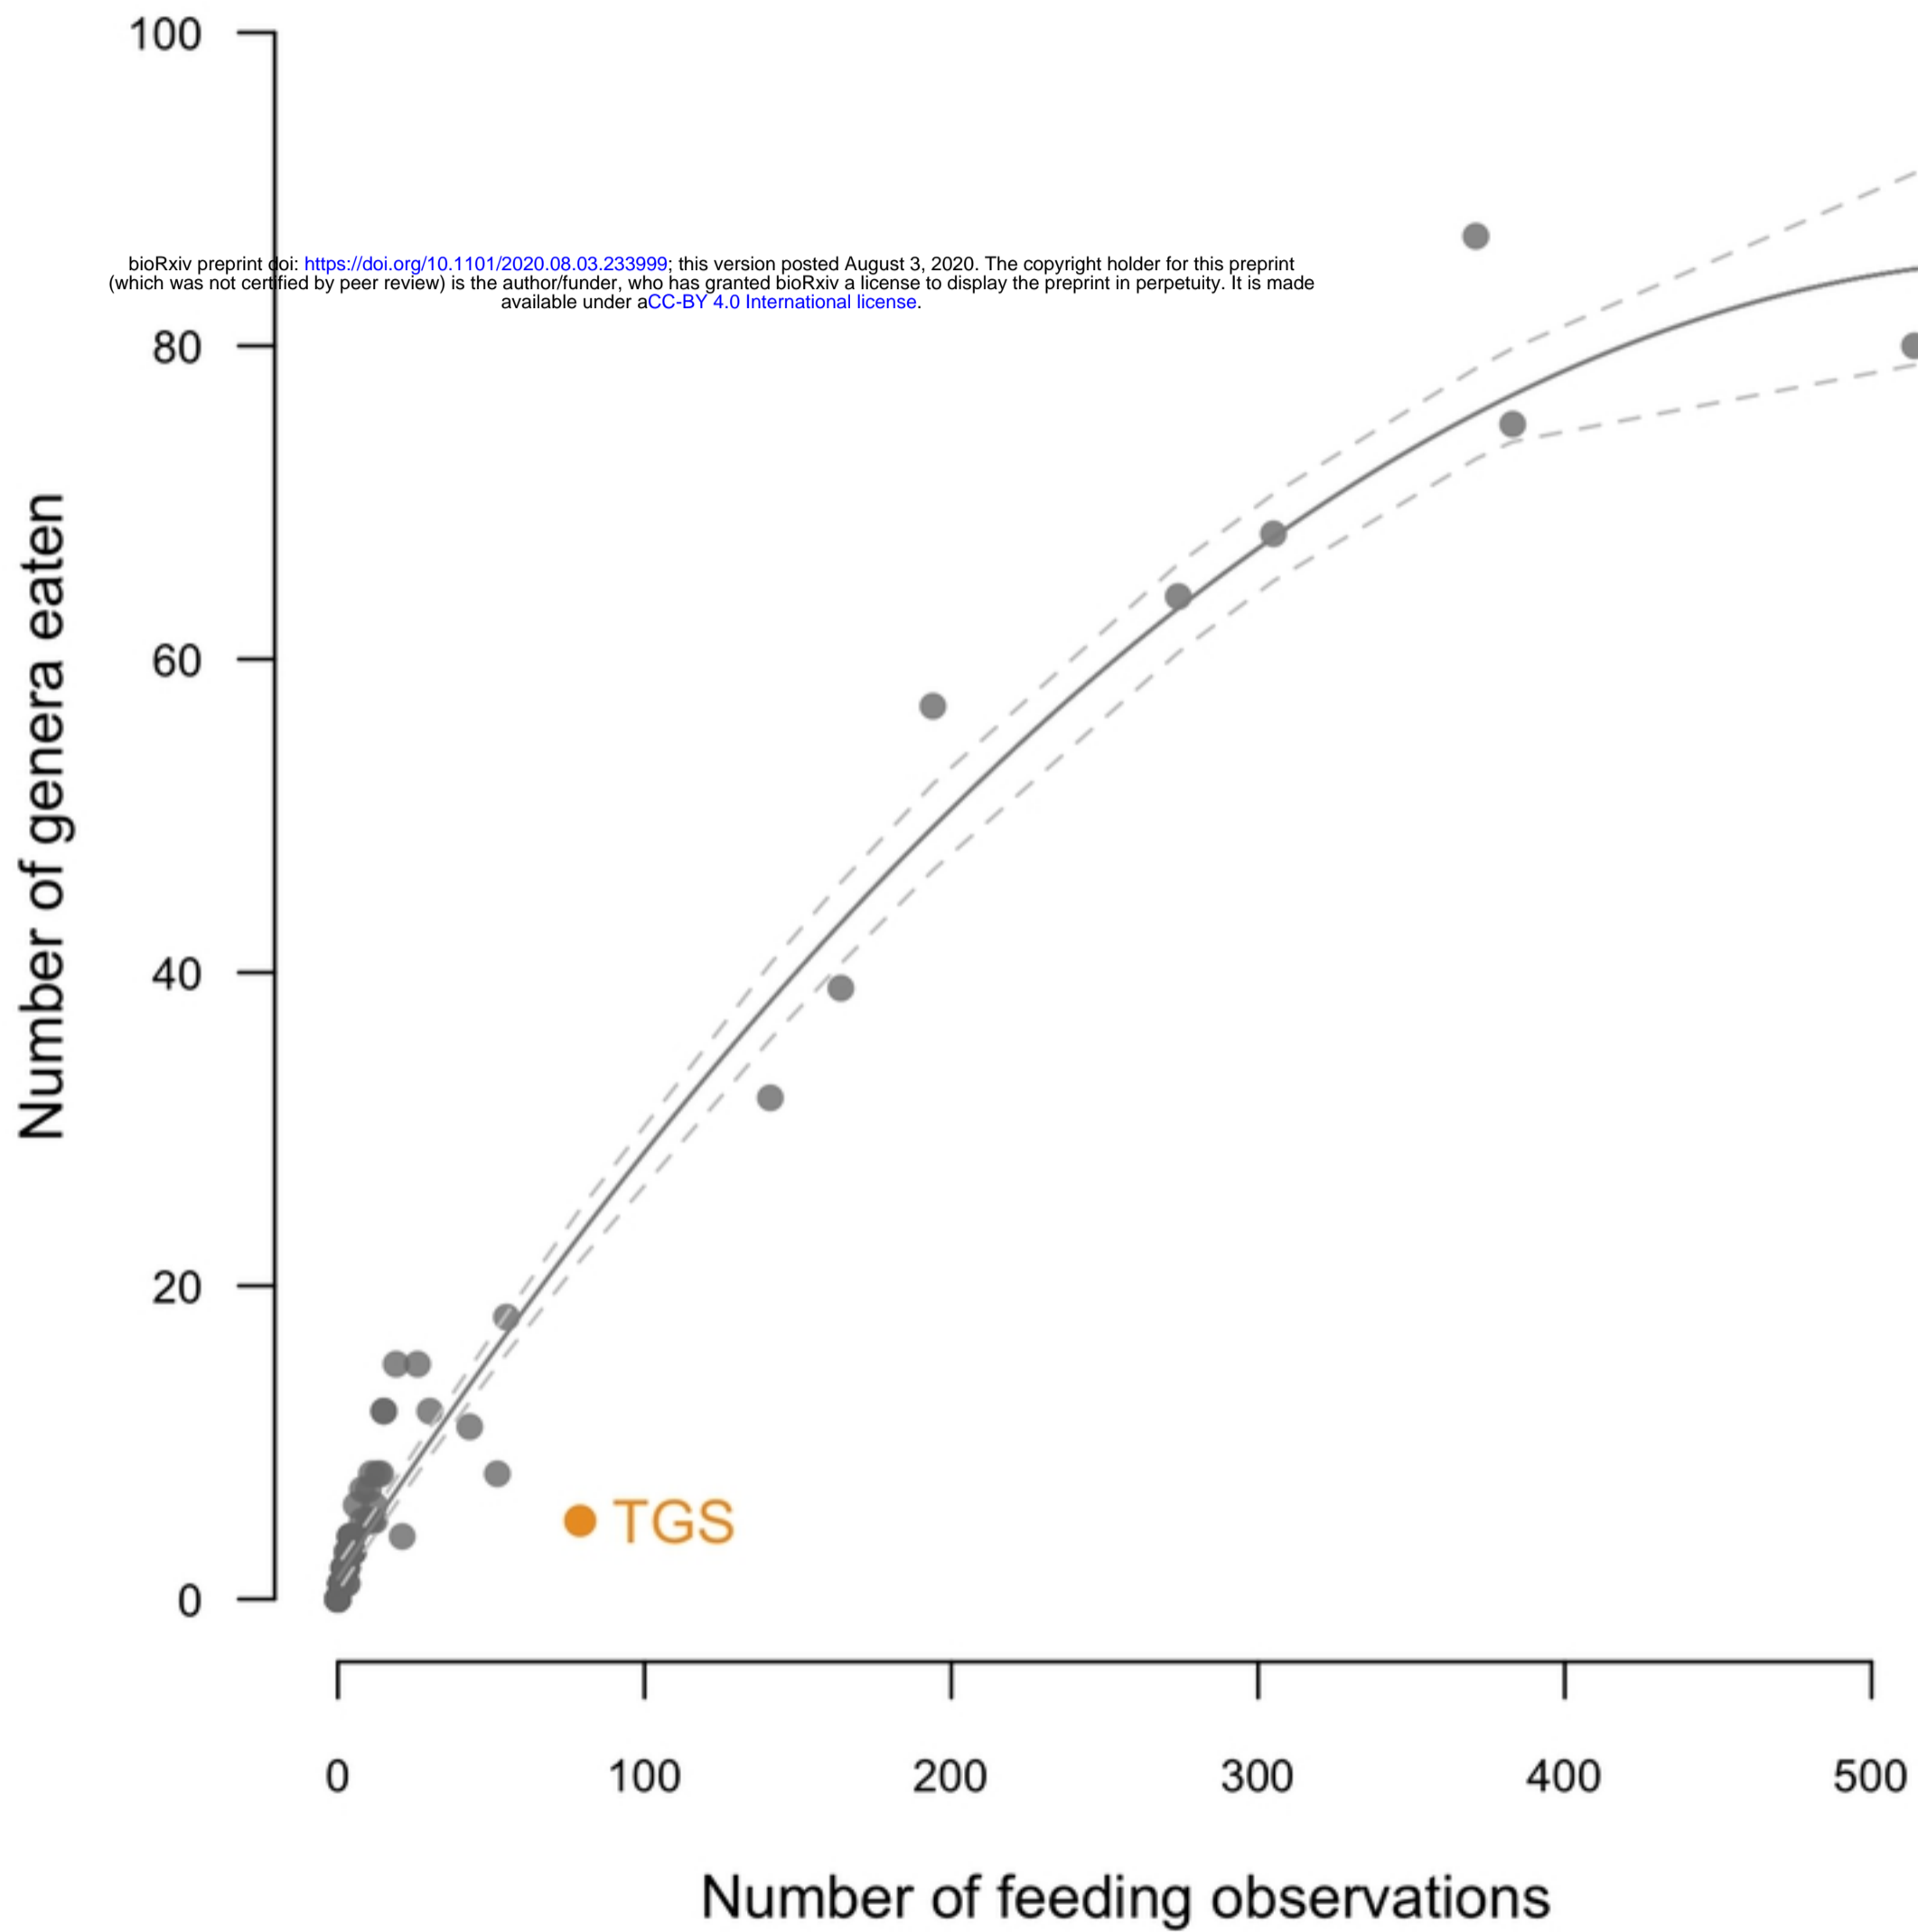

Figure 1

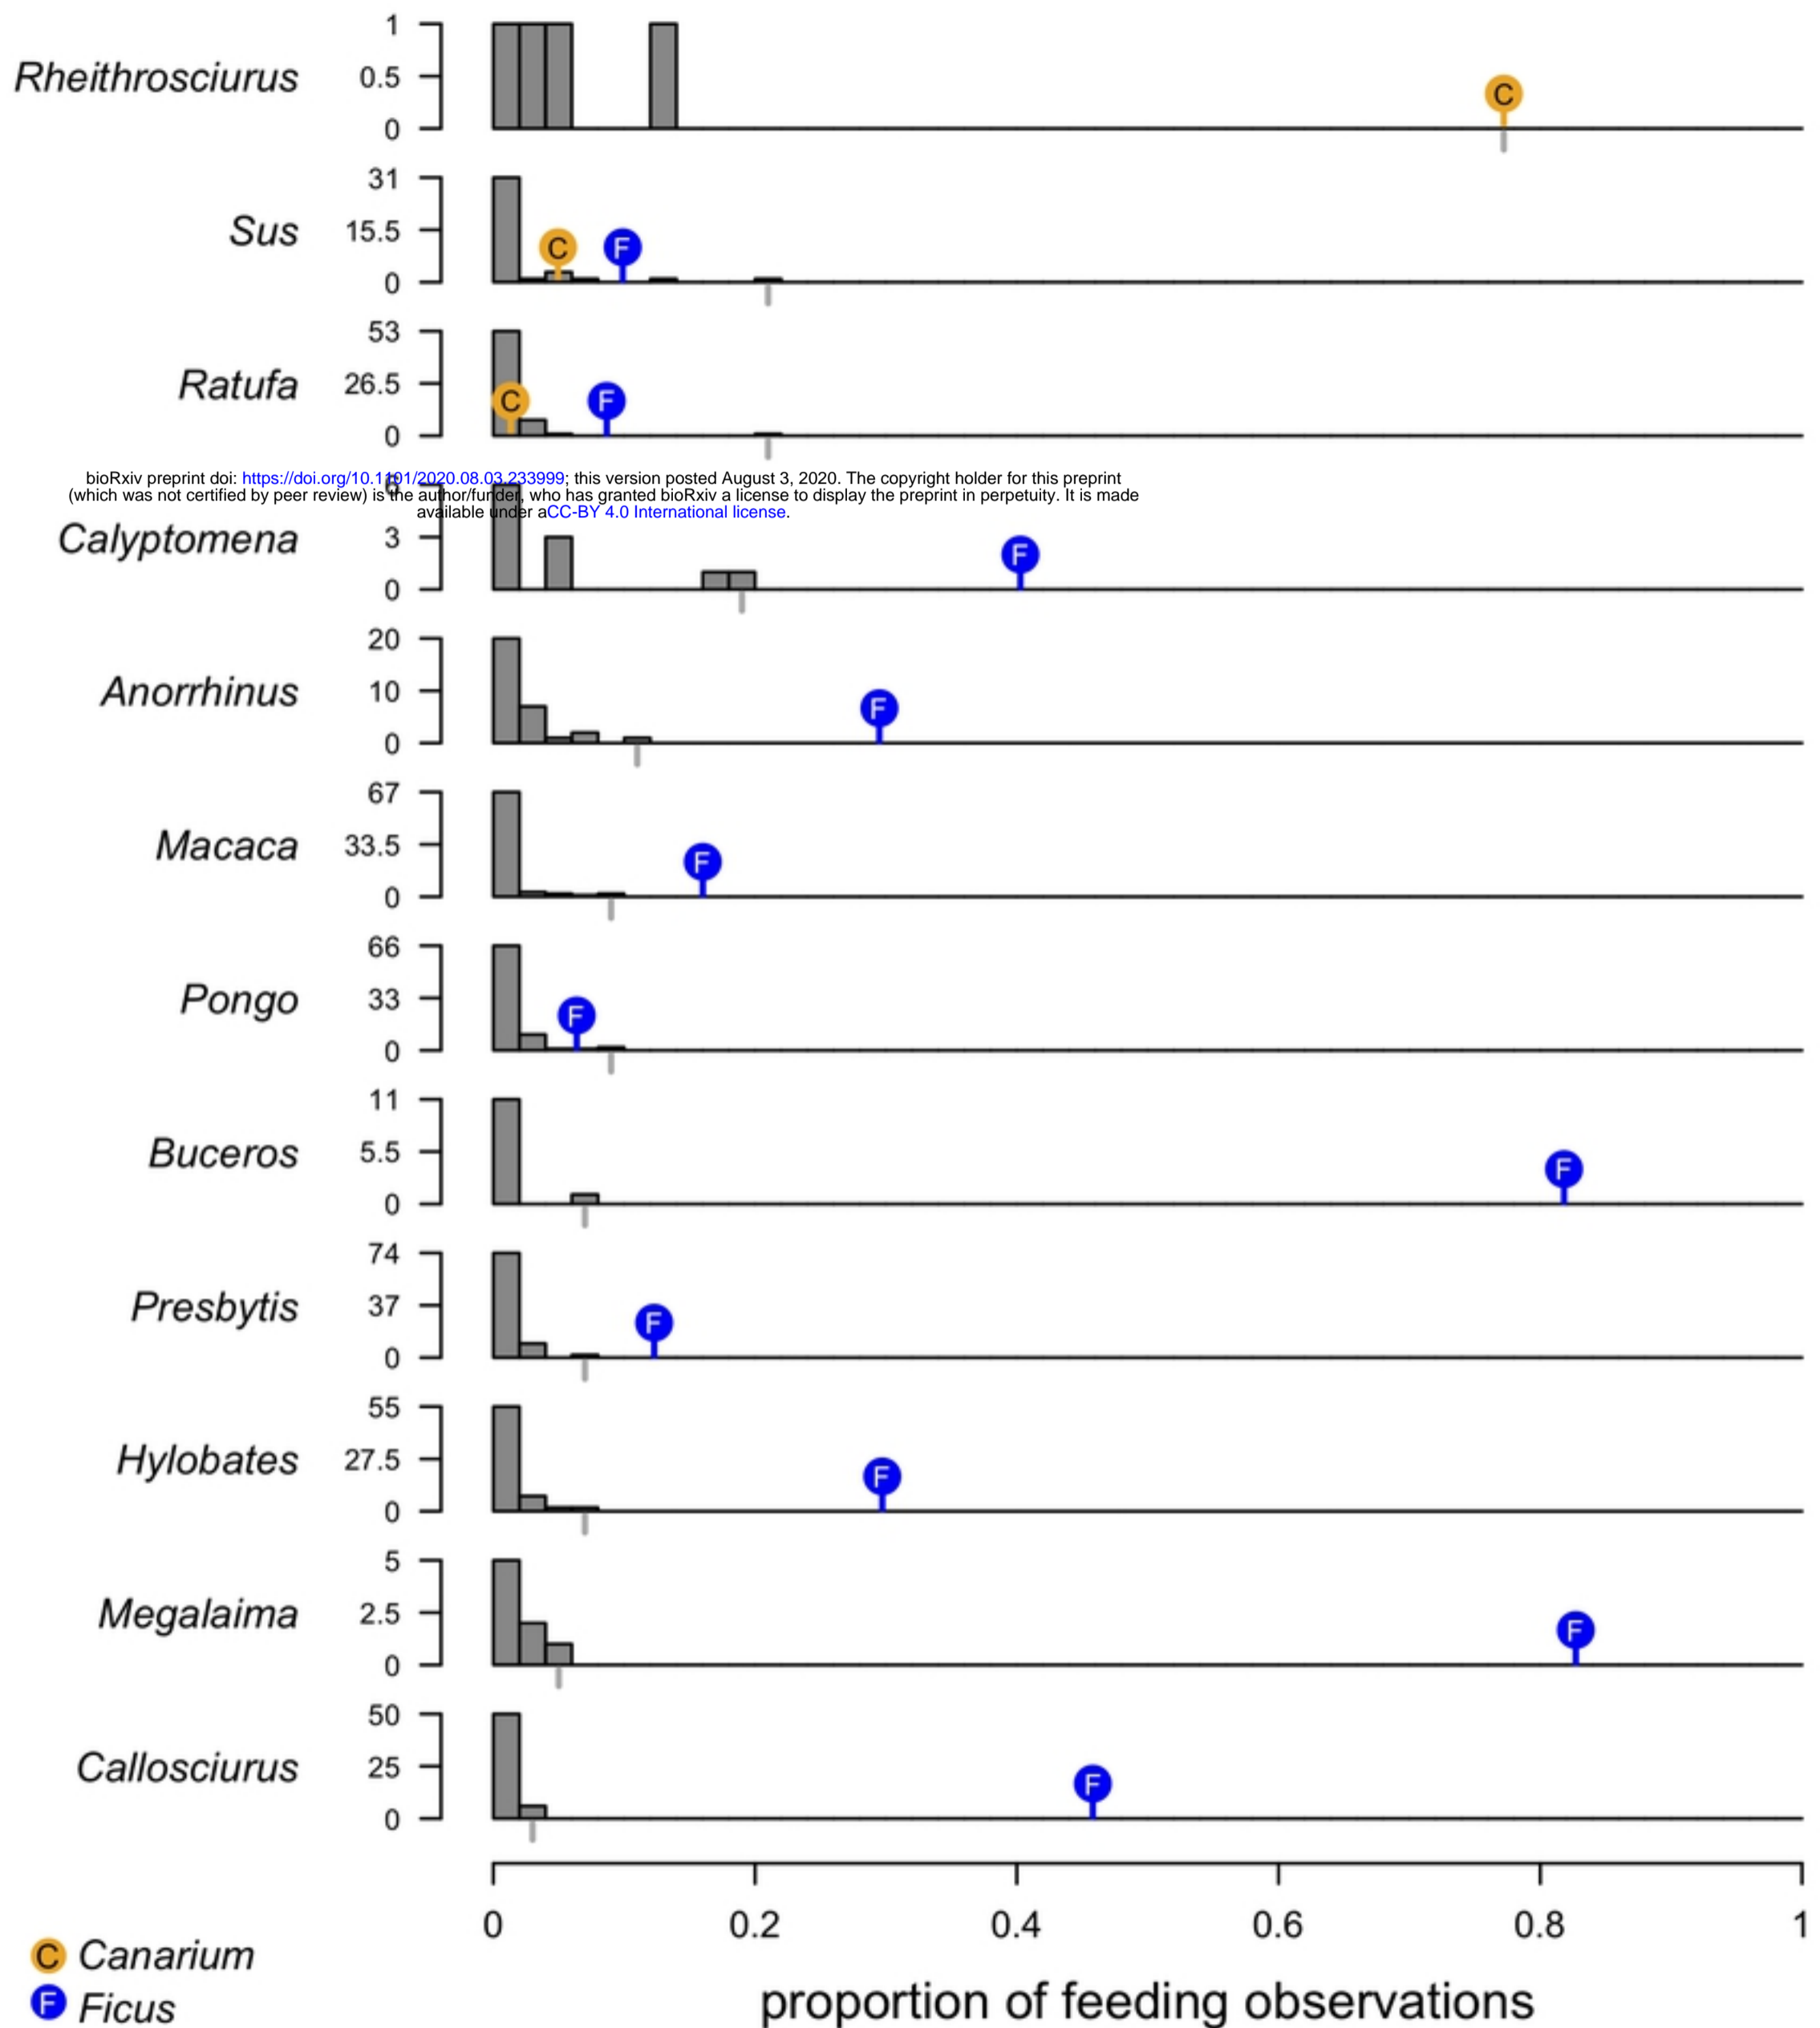

Figure 2
